# Supplementary material for: Immune-Related Protein Interaction Network in Severe COVID-19 Patients toward the Identification of Key Proteins and Drug Repurposing
Source: MDPI journal article supplement (doi:10.3390/biom12050690), 2022-05-11
Supplement: s1 [file s1]

**Table S9.** List of nodes with high degree centrality.

| Ensembl ID      | Symbol | Degree Centrality |
|-----------------|--------|-------------------|
| ENSP00000360869 | IFIT1  | 39                |
| ENSP00000368699 | ISG15  | 38                |
| ENSP00000371471 | RSAD2  | 38                |
| ENSP00000381601 | MX1    | 38                |
| ENSP00000360883 | IFIT3  | 37                |
| ENSP00000354394 | STAT1  | 36                |
| ENSP00000360891 | IFIT2  | 34                |
| ENSP00000380697 | IRF7   | 33                |
| ENSP00000257570 | OASL   | 32                |
| ENSP00000274026 | CCNA2  | 31                |
| ENSP00000342278 | OAS2   | 31                |
| ENSP00000342513 | IFI6   | 31                |
| ENSP00000354822 | XAF1   | 31                |
| ENSP00000388001 | OAS1   | 31                |
| ENSP00000395590 | IFI35  | 31                |

**Table S10.** List of nodes with high betweenness centrality.

| Ensembl ID      | Symbol | Betweenness Centrality |
|-----------------|--------|------------------------|
| ENSP00000303706 | CDC25A | 0.248509               |
| ENSP00000371471 | RSAD2  | 0.221581               |
| ENSP00000256722 | CMPK2  | 0.207767               |
| ENSP00000353770 | RRM2   | 0.205415               |
| ENSP00000274026 | CCNA2  | 0.186888               |
| ENSP00000263642 | IFIH1  | 0.149838               |
| ENSP00000369213 | DDX58  | 0.111075               |
| ENSP00000361540 | CDC20  | 0.051103               |
| ENSP00000395590 | IFI35  | 0.042906               |
| ENSP00000342307 | FOXM1  | 0.041747               |

**Table S11.** List of nodes with high closeness centrality.

| Ensembl ID      | Symbol | Closeness Centrality |
|-----------------|--------|----------------------|
| ENSP00000371471 | RSAD2  | 0.436364             |
| ENSP00000303706 | CDC25A | 0.428571             |
| ENSP00000256722 | CMPK2  | 0.424779             |
| ENSP00000353770 | RRM2   | 0.422907             |
| ENSP00000263642 | IFIH1  | 0.419214             |
| ENSP00000274026 | CCNA2  | 0.417391             |
| ENSP00000369213 | DDX58  | 0.415584             |
| ENSP00000262643 | CCNE1  | 0.388664             |
| ENSP00000360869 | IFIT1  | 0.38247              |
| ENSP00000368699 | ISG15  | 0.380952             |
| ENSP00000381601 | MX1    | 0.380952             |

**Table S12.** List of nodes with high eigenvector centrality.

| <b>Ensembl ID</b> | <b>Symbol</b> | <b>Eigenvector Centrality</b> |
|-------------------|---------------|-------------------------------|
| ENSP00000360869   | IFIT1         | 1                             |
| ENSP00000381601   | MX1           | 0.994698                      |
| ENSP00000368699   | ISG15         | 0.994698                      |
| ENSP00000371471   | RSAD2         | 0.989394                      |
| ENSP00000360883   | IFIT3         | 0.985845                      |
| ENSP00000360891   | IFIT2         | 0.968306                      |
| ENSP00000354394   | STAT1         | 0.963544                      |
| ENSP00000354822   | XAF1          | 0.93284                       |
| ENSP00000342513   | IFI6          | 0.93284                       |
| ENSP00000380697   | IRF7          | 0.927411                      |
